# Supplementary material for: Photocatalytic conversion of arylboronic acids to phenols by a new 2D donor–acceptor covalent organic framework
Source: Royal Society of Chemistry journal article supplement (doi:10.1039/d2ma00237j), 2022-01-01
Supplement: d2ma00237j1.pdf [file d2ma00237j1.pdf]

## Supporting Information

### **Photocatalytic conversion of arylboronic acids to phenols by a new 2D donor–acceptor Covalent Organic Framework**

Bingcai Luo<sup>†</sup>, Yubao Zhang<sup>†</sup>, Ying Chen, Jianqiang Huo\*

*College of Chemistry and Chemical Engineering,*

*Key Laboratory of Eco-functional Polymer Materials of the Ministry of Education,*

*Key Laboratory of Eco-environmental Polymer Materials of Gansu Province,*

*Northwest Normal University, Lanzhou 730070, P. R. China*

<sup>†</sup> These authors contributed equally to this work.

\*Corresponding author: Jianqiang Huo

*E-mail:* huojianqiang@hotmail.com

# Contents

|                                                                                                                  |    |
|------------------------------------------------------------------------------------------------------------------|----|
| Synthesis of benzo[1,2-b:3,4-b':5,6-b']trithiophene-2,5,8-trialdehyde (BTT) .....                                | 3  |
| Synthesis of 4,4'-(benzothiadiazole-4,7-diyl)dianiline (BTDDA).....                                              | 4  |
| Synthesis of BTT-BTDDA-COF .....                                                                                 | 5  |
| Surface morphology analysis .....                                                                                | 5  |
| Fig. S2 BTT-BTDDA-COF experiment (black), predicted AA stacking (red) and AB stacking (blue) PXRD patterns;..... | 6  |
| Fig. S3 XPS full spectrum of BTT-BTDDA-COF. ....                                                                 | 6  |
| Fig. S4 (a) VB-XPS spectrum of BTT-BTDDA-COF; (b) Schematic diagram of band structure of BTT-BTDDA-COF.....      | 6  |
| Photocatalytic conversion of arylboronic acids to phenols .....                                                  | 7  |
| Table S1 Fractional atomic coordinates for the unit cell of BTT-BTDDA-COF .....                                  | 10 |
| NMR Spectra of Some Compounds.....                                                                               | 14 |
| Fig. S5 FT-IR diagram before and after the reaction.....                                                         | 27 |
| Fig. S6 SEM before (a) and (b) SEM after the reaction.....                                                       | 27 |

### Synthesis of benzo[1,2-b:3,4-b':5,6-b']trithiophene-2,5,8-trialdehyde (BTT)

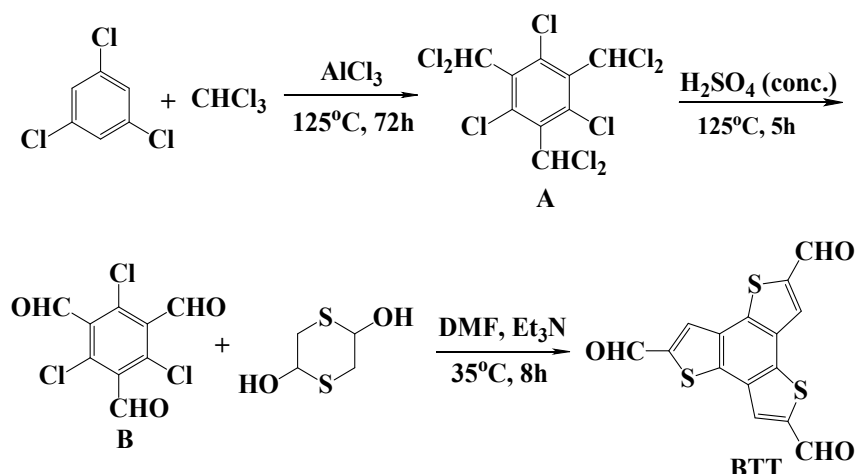

**Scheme S1.** Synthetic route approach to **BTT**

Synthesis of **A**. 1,3,5-trichlorobenzene (3 g, 16.6 mmol) and  $\text{AlCl}_3$  (2.6 g, 19.6 mmol) dissolved in 60 mL of  $\text{CHCl}_3$ , reacted in the reactor at 125 °C for 3 days. Then the reaction mixture was cooled to room temperature and transferred to an ice-water mixture containing 60 mL  $\text{CHCl}_3$  and 20 mL  $\text{HCl}$ , and stirred for 1 hour. Subsequently, it was extracted with a 5%  $\text{NaHCO}_3$  aqueous solution, the collected organic phase was dried over anhydrous  $\text{MgSO}_4$ , and the solvent was distilled off under reduced pressure to obtain a brown solid. Compound **A** was further purified by silica gel column (eluent: PE/EA=5/1).

Synthesis of **B**. Compound **A** (2.2 g, 5.1 mmol) and  $\text{FeSO}_4$  (0.1 g, 0.7 mmol) were added to 12 mL of concentrated  $\text{H}_2\text{SO}_4$  and reacted at 125 °C for 5 hours. Then the reaction mixture was cooled to room temperature, poured into ice water and extracted with dichloromethane. After the collected organic phase was dried over anhydrous  $\text{MgSO}_4$ , the organic phase solution was concentrated and purified by silica gel chromatography to obtain compound **B**.

Synthesis of **BTT**. At room temperature, compound **B** (1.17 g, 4.4 mmol), p-dithiophene-2,5-diol (1 g, 6.6 mmol) were dispersed in 15 mL DMF, and then triethylamine (3.67 mL, 26.4 mmol) was added to it. Subsequently, the above mixture was stirred at 35 °C for 8 hours. Then the reaction mixture was poured into ice water, the precipitate was separated by centrifugation, and washed several times with water, THF and ethanol, respectively, to obtain a dark yellow solid (**BTT**). The solubility of

**BTT** in various solvents is very poor, so no further characterization was performed.

m.p. > 300 °C.

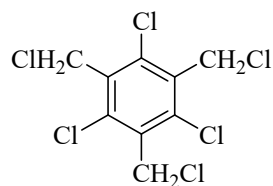

**A.** 1,3,5-trichloro-2,4,6-tris(chloromethyl)benzene:  $^1\text{H NMR}(\delta, \text{CDCl}_3, 25^\circ\text{C})$ : 7.75(s, 2H).

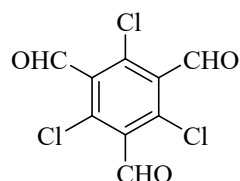

**B.** 1,3,5-Trichloro-benzene-1,3,5-tricarbaldehyde:  $^1\text{H NMR}(\delta, \text{CDCl}_3)$ : 10.41 (s).

#### Synthesis of 4,4'-(benzothiadiazole-4,7-diyl)dianiline (**BTDDA**)

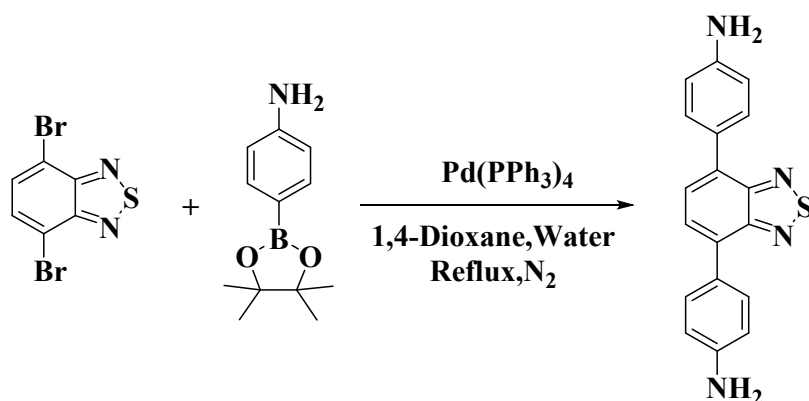

#### **Scheme S2** Synthesis of 4,4'-(benzothiadiazole-4,7-diyl)dianiline (**BTDDA**).

4,7-dibromobenzo[*c*][1,2,5]thiadiazole (2 g, 6.82 mmol), 4-aminophenylborate (3.59 g, 16.39 mmol),  $\text{Pd}(\text{PPh}_3)_4$  (0.28 g, 0.24 mmol) and  $\text{K}_2\text{CO}_3$  (4.5 g, 32.45 mmol) were added into a round-bottom flask with 1, 4-dioxane (100 mL) and water (20 mL). After refluxing for 72 hours under nitrogen atmosphere, the precipitate was cooled to room temperature, extracted with ethyl acetate, and then washed with salt water. The crude product was purified by silica gel column chromatography to obtain red solid.

$^1\text{H NMR}$  (400 MHz,  $\text{DMSO}-d_6$ )  $\delta$  7.80 – 7.72 (m, 2H), 7.73 – 7.68 (m, 1H), 6.70 (d,  $J = 5.9$  Hz, 2H), 5.39 (s, 2H).  $^{13}\text{C NMR}$  (150 MHz,  $\text{DMSO}-d_6$ )  $\delta$  154.11, 149.37, 131.43, 130.18, 126.57, 124.80, 114.16.

## Synthesis of BTT-BTDDA-COF

**BTT** (66.1 mg, 0.2 mmol) and **BTDDA** (95.5 mg, 0.3 mmol) were placed in a heat-resistant glass bottle, and 1, 4-dioxane (3 mL), trimethylbenzene (3 mL), and 6 M AcOH (0.3 mL) were added, respectively. After ultrasonic dispersion for 5 min, the mixture was sealed in N<sub>2</sub> atmosphere and heated at 120 °C for 3 days. After cooling to room temperature, the products were separated by centrifugation, washed with DMF, methanol and ethanol for several times successively, and then Soxhlet extracted with THF for 24 h. Finally, the obtained solids were dried at 100 °C for 12 h in vacuum to obtain red **BTT-BTDDA-COF**.

## Surface morphology analysis

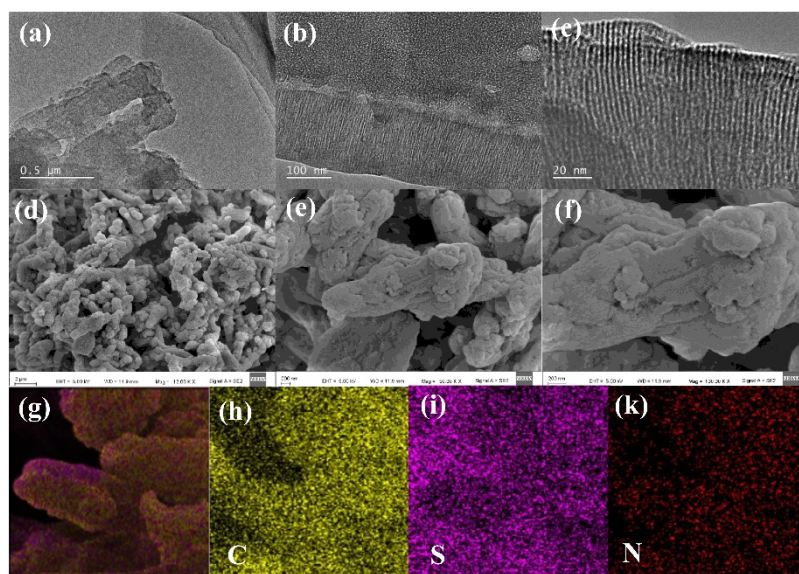

**Fig. S1** TEM image of BTT-BTDDA-COF COFs, scales are 0.5 μm (a)、100 nm (b) and 20 nm (c); SEM image of BTT-BTDDA-COF, scales are 2 μm (d)、200 nm (e)、 and 202 nm (f); EDS mapping image of BTT- BTDDA -COF: EDS scanning area; (g), C (h)、S (i)、N (k) element EDS mapping.

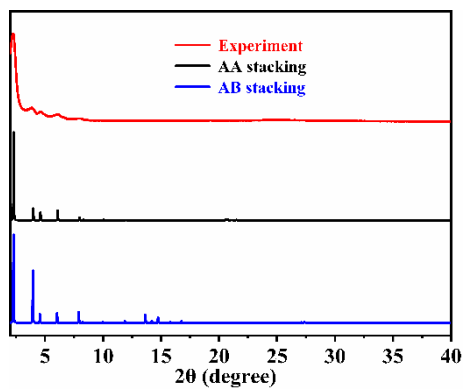

**Fig. S2** BTT-BTDDA-COF experiment (red), predicted AA stacking (black) and AB stacking (blue) PXR D patterns;

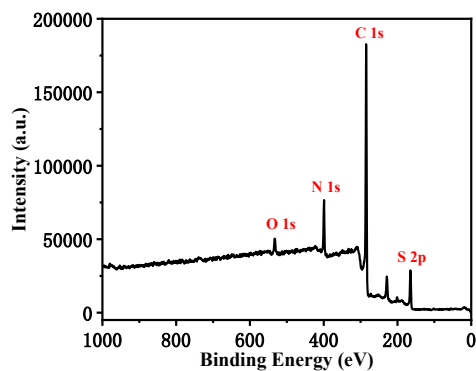

**Fig. S3** XPS full spectrum of BTT-BTDDA-COF.

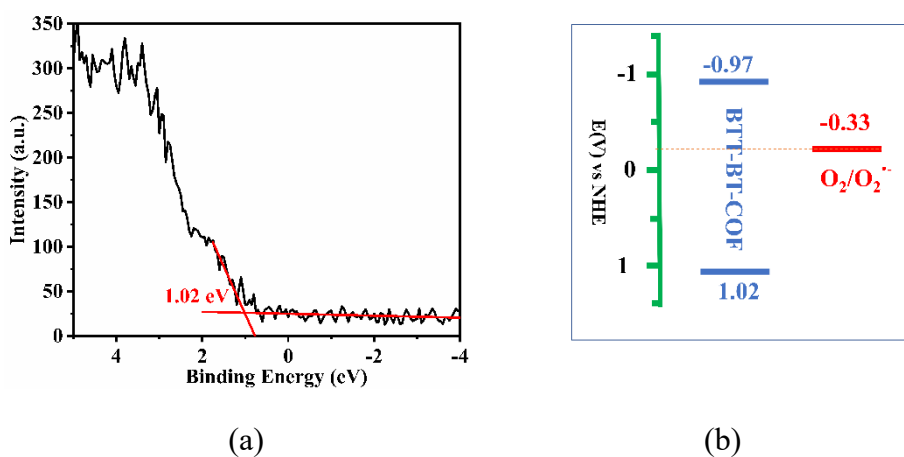

**Fig. S4** (a) VB-XPS spectrum of BTT-BTDDA-COF; (b) Schematic diagram of band structure of BTT-BTDDA-COF.

## Photocatalytic conversion of arylboronic acids to phenols

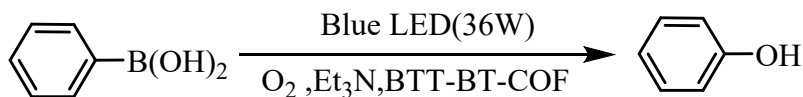

**Scheme S3.** Photocatalytic reaction for oxidative hydroxylation of 4-formylphenylboronic acid.

Phenylboronic acid (0.1 mmol), triethylamine (0.3 mmol), and BTT-BTDDA-COF (2 mg) were added to a translucent glass bottle containing 3 mL acetonitrile. The reaction was irradiated by 36 W blue LED lamp and stirred at room temperature. The reaction process was detected by TLC. The catalyst was removed by centrifugation from the reacted mixed solution. The solvent was removed by rotary evaporation to obtain the crude product, and the product was purified by column chromatography to obtain phenol (eluent: petroleum ether/ethyl acetate =5:1).

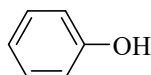

**1. Phenol:** white solid,  $^1\text{H NMR}$  (400 MHz,  $\text{CDCl}_3$ )  $\delta$  7.30 – 7.23 (m, 2H), 6.95 (t,  $J$  = 7.4 Hz, 1H), 6.88 – 6.83 (m, 2H), 4.99 (s, 1H).  $^{13}\text{CNMR}$  (150 MHz,  $\text{CDCl}_3$ )  $\delta$  155.38, 129.70, 120.86, 115.32.

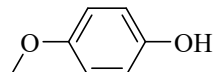

**2. 4-Methoxyphenol:** white solid,  $^1\text{H NMR}$  (400 MHz,  $\text{CDCl}_3$ )  $\delta$  6.77 (d,  $J$  = 2.9 Hz, 4H), 5.26 (s, 1H), 3.76 (s, 3H).  $^{13}\text{C NMR}$  (150 MHz,  $\text{CDCl}_3$ )  $\delta$  153.62, 153.58, 149.54, 116.24, 116.17, 116.14, 115.07, 114.97, 55.89.

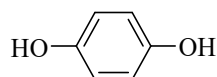

**3. Hydroquinone:** white solid,  $^1\text{H NMR}$  (400 MHz,  $\text{DMSO-}d_6$ )  $\delta$  8.60 (d,  $J$  = 2.6 Hz, 1H), 6.55 (d,  $J$  = 3.0 Hz, 2H).  $^{13}\text{C NMR}$  (150 MHz,  $\text{DMSO-}d_6$ )  $\delta$  150.17, 116.10.

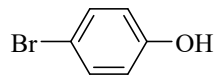

**4. 4-Bromophenol:** white solid,  $^1\text{H NMR}$  (400 MHz,  $\text{CDCl}_3$ )  $\delta$  7.33 (d,  $J$  = 8.8 Hz, 2H), 6.72 (d,  $J$  = 8.8 Hz, 2H), 4.86 (s, 1H).  $^{13}\text{C NMR}$  (150 MHz,  $\text{CDCl}_3$ )  $\delta$  154.58, 132.47, 117.18, 112.89.

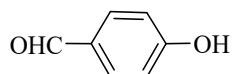

**5. *p*-Hydroxybenzaldehyde:** light yellow,  $^1\text{H NMR}$  (400 MHz,  $\text{DMSO-}d_6$ )  $\delta$  10.64 (s, 1H), 9.77 (s, 1H), 7.74 (d,  $J$  = 4.9 Hz, 2H), 6.93 (d,  $J$  = 4.9 Hz, 2H).  $^{13}\text{C NMR}$  (150 MHz,  $\text{DMSO-}d_6$ )  $\delta$  191.37, 163.80, 132.52, 128.84, 116.29.

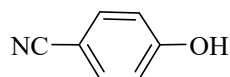

**6. 4-Cyanophenol:** white solid,  $^1\text{H}$  NMR (400 MHz,  $\text{CDCl}_3$ )  $\delta$  7.55 (d,  $J = 7.0$  Hz, 2H), 6.94 (d,  $J = 7.0$  Hz, 2H), 6.86 (s, 1H).  $^{13}\text{C}$  NMR (150 MHz,  $\text{CDCl}_3$ )  $\delta$  160.04, 134.31, 119.21, 116.42, 103.27.

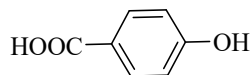

**7. 4-Hydroxybenzoic acid:** white solid,  $^1\text{H}$  NMR (400 MHz,  $\text{DMSO-}d_6$ )  $\delta$  12.40 (s, 1H), 10.19 (s, 1H), 7.77 (d,  $J = 7.0$  Hz, 2H), 6.80 (d,  $J = 7.0$  Hz, 2H).  $^{13}\text{C}$  NMR (150 MHz,  $\text{DMSO-}d_6$ )  $\delta$  167.60, 162.03, 131.96, 121.79, 115.55.

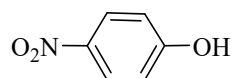

**8. 4-Nitrophenol:** Light yellow,  $^1\text{H}$  NMR (400 MHz,  $\text{DMSO-}d_6$ )  $\delta$  11.03 (s, 1H), 8.09 (d,  $J = 6.7$  Hz, 2H), 6.90 (d,  $J = 6.8$  Hz, 2H).  $^{13}\text{C}$  NMR (150 MHz,  $\text{DMSO-}d_6$ )  $\delta$  164.34, 140.04, 126.60, 116.21.

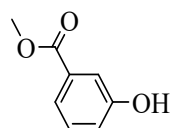

**9. Methyl 3-hydroxybenzoate:** white solid,  $^1\text{H}$  NMR (400 MHz,  $\text{CDCl}_3$ )  $\delta$  7.61 (s, 1H), 7.61 – 7.58 (m, 1H), 7.31 (t,  $J = 8.2$  Hz, 1H), 7.14 – 7.05 (m, 1H), 6.13 (s, 1H), 3.92 (s, 3H).  $^{13}\text{C}$  NMR (150 MHz,  $\text{CDCl}_3$ )  $\delta$  167.50, 155.97, 131.23, 129.73, 121.83, 120.41, 116.38, 52.39.

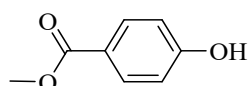

**10. Methylparaben:** white solid,  $^1\text{H}$  NMR (400 MHz,  $\text{CDCl}_3$ )  $\delta$  7.95 (d,  $J = 8.8$  Hz, 2H), 6.90 (d,  $J = 8.8$  Hz, 2H), 6.79 (s, 1H), 3.90 (s, 3H).  $^{13}\text{C}$  NMR (150 MHz,  $\text{CDCl}_3$ )  $\delta$  167.47, 160.30, 131.95, 122.23, 115.28, 52.08.

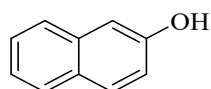

**11. 2-Naphthol:** white solid,  $^1\text{H}$  NMR (400 MHz,  $\text{CDCl}_3$ )  $\delta$  7.78 (t,  $J = 8.6$  Hz, 2H), 7.69 (d,  $J = 8.2$  Hz, 1H), 7.49 – 7.41 (m, 1H), 7.35 (ddd,  $J = 8.2, 6.9, 1.3$  Hz, 1H), 7.18 – 7.09 (m, 2H), 5.15 (s, 1H).  $^{13}\text{C}$  NMR (150 MHz,  $\text{CDCl}_3$ )  $\delta$  153.29, 129.86, 129.85, 128.95, 127.77, 126.54, 126.37, 123.64, 117.72, 109.51.



**Table S1** Fractional atomic coordinates for the unit cell of **BTT-BTDDA-COF**

| <b>BTT-BTDDA-COF: Space group: P6 (C3H-1)</b>             |      |        |        |       |
|-----------------------------------------------------------|------|--------|--------|-------|
| a = 44.277 Å, b = 44.277 Å, c = 4.3087 Å                  |      |        |        |       |
| $\alpha = 90^\circ, \beta = 90^\circ, \gamma = 120^\circ$ |      |        |        |       |
| Sequence number                                           | atom | x      | y      | z     |
| 1                                                         | C    | 18.234 | 33.088 | 2.154 |
| 2                                                         | C    | 18.790 | 31.808 | 2.154 |
| 3                                                         | C    | 20.186 | 31.722 | 2.154 |
| 4                                                         | C    | 17.897 | 30.629 | 2.154 |
| 5                                                         | C    | 16.513 | 30.802 | 2.154 |
| 6                                                         | C    | 15.659 | 29.711 | 2.154 |
| 7                                                         | C    | 16.170 | 28.423 | 2.154 |
| 8                                                         | C    | 17.550 | 28.237 | 2.154 |
| 9                                                         | C    | 18.401 | 29.331 | 2.154 |
| 10                                                        | N    | 15.269 | 27.325 | 2.154 |
| 11                                                        | S    | 12.907 | 25.296 | 2.154 |
| 12                                                        | C    | 14.693 | 25.017 | 2.154 |
| 13                                                        | C    | 15.657 | 26.100 | 2.154 |
| 14                                                        | C    | 15.084 | 23.758 | 2.154 |
| 15                                                        | C    | 13.957 | 22.864 | 2.154 |
| 16                                                        | C    | 12.750 | 23.522 | 2.154 |
| 17                                                        | S    | 22.545 | 30.885 | 2.154 |
| 18                                                        | N    | 20.892 | 30.593 | 2.154 |
| 19                                                        | C    | 21.278 | 5.709  | 2.154 |
| 20                                                        | C    | 22.024 | 6.885  | 2.154 |
| 21                                                        | C    | 21.388 | 8.115  | 2.154 |
| 22                                                        | C    | 19.996 | 8.200  | 2.154 |
| 23                                                        | C    | 19.261 | 7.017  | 2.154 |
| 24                                                        | C    | 19.894 | 5.785  | 2.154 |
| 25                                                        | N    | 21.897 | 4.432  | 2.154 |
| 26                                                        | C    | 23.172 | 4.270  | 2.154 |
| 27                                                        | C    | 25.058 | 2.768  | 2.154 |
| 28                                                        | C    | 23.751 | 2.941  | 2.154 |
| 29                                                        | S    | 22.749 | 1.437  | 2.154 |
| 30                                                        | C    | 24.295 | 0.550  | 2.154 |
| 31                                                        | C    | 25.398 | 1.371  | 2.154 |
| 32                                                        | H    | 17.110 | 33.216 | 2.154 |
| 33                                                        | H    | 16.074 | 31.845 | 2.154 |
| 34                                                        | H    | 14.540 | 29.875 | 2.154 |
| 35                                                        | H    | 17.979 | 27.191 | 2.154 |
| 36                                                        | H    | 19.521 | 29.175 | 2.154 |
| 37                                                        | H    | 16.765 | 25.871 | 2.154 |
| 38                                                        | H    | 16.136 | 23.342 | 2.154 |

|    |   |        |         |       |
|----|---|--------|---------|-------|
| 39 | H | 23.154 | 6.834   | 2.154 |
| 40 | H | 22.002 | 9.065   | 2.154 |
| 41 | H | 18.130 | 7.060   | 2.154 |
| 42 | H | 19.281 | 4.834   | 2.154 |
| 43 | H | 23.848 | 5.177   | 2.154 |
| 44 | H | 25.748 | 3.666   | 2.154 |
| 45 | C | 20.430 | -10.156 | 2.154 |
| 46 | C | 19.038 | -10.055 | 2.154 |
| 47 | C | 20.974 | -11.445 | 2.154 |
| 48 | N | 22.273 | -11.737 | 2.154 |
| 49 | H | 18.544 | -9.038  | 2.154 |
| 50 | C | 22.762 | -6.567  | 2.154 |
| 51 | C | 21.371 | -6.508  | 2.154 |
| 52 | C | 20.624 | -7.674  | 2.154 |
| 53 | C | 21.246 | -8.922  | 2.154 |
| 54 | C | 22.638 | -8.967  | 2.154 |
| 55 | C | 23.389 | -7.802  | 2.154 |
| 56 | N | 23.559 | -5.391  | 2.154 |
| 57 | C | 23.061 | -4.207  | 2.154 |
| 58 | C | 23.419 | -1.822  | 2.154 |
| 59 | C | 23.923 | -3.040  | 2.154 |
| 60 | S | 25.727 | -3.156  | 2.154 |
| 61 | C | 25.721 | -1.374  | 2.154 |
| 62 | C | 24.459 | -0.829  | 2.154 |
| 63 | H | 20.850 | -5.504  | 2.154 |
| 64 | H | 19.494 | -7.617  | 2.154 |
| 65 | H | 23.167 | -9.968  | 2.154 |
| 66 | H | 24.519 | -7.858  | 2.154 |
| 67 | H | 21.938 | -4.075  | 2.154 |
| 68 | H | 22.297 | -1.674  | 2.154 |
| 69 | C | 0.574  | 21.386  | 2.154 |
| 70 | C | 1.405  | 22.507  | 2.154 |
| 71 | C | 0.781  | 23.760  | 2.154 |
| 72 | C | 2.872  | 22.323  | 2.154 |
| 73 | C | 3.414  | 21.039  | 2.154 |
| 74 | C | 4.786  | 20.844  | 2.154 |
| 75 | C | 5.646  | 21.931  | 2.154 |
| 76 | C | 5.116  | 23.219  | 2.154 |
| 77 | C | 3.744  | 23.409  | 2.154 |
| 78 | N | 7.047  | 21.700  | 2.154 |
| 79 | S | 9.985  | 20.668  | 2.154 |
| 80 | C | 9.334  | 22.355  | 2.154 |
| 81 | C | 7.914  | 22.648  | 2.154 |
| 82 | C | 10.229 | 23.323  | 2.154 |

|     |   |        |        |       |
|-----|---|--------|--------|-------|
| 83  | C | 11.566 | 22.794 | 2.154 |
| 84  | C | 11.600 | 21.420 | 2.154 |
| 85  | S | 0.326  | 26.221 | 2.154 |
| 86  | N | 1.405  | 24.936 | 2.154 |
| 87  | H | 1.024  | 20.348 | 2.154 |
| 88  | H | 2.730  | 20.137 | 2.154 |
| 89  | H | 5.203  | 19.793 | 2.154 |
| 90  | H | 5.808  | 24.114 | 2.154 |
| 91  | H | 3.318  | 24.457 | 2.154 |
| 92  | H | 7.558  | 23.722 | 2.154 |
| 93  | H | 10.063 | 24.442 | 2.154 |
| 94  | C | 36.926 | 0.632  | 2.154 |
| 95  | C | 37.535 | -0.624 | 2.154 |
| 96  | C | 37.770 | 1.747  | 2.154 |
| 97  | N | 37.374 | 3.018  | 2.154 |
| 98  | H | 36.901 | -1.560 | 2.154 |
| 99  | C | 19.335 | 9.524  | 2.154 |
| 100 | C | 20.118 | 10.679 | 2.154 |
| 101 | C | 19.538 | 11.943 | 2.154 |
| 102 | C | 18.151 | 12.102 | 2.154 |
| 103 | C | 17.379 | 10.935 | 2.154 |
| 104 | C | 17.947 | 9.697  | 2.154 |
| 105 | C | 17.577 | 13.464 | 2.154 |
| 106 | C | 18.419 | 14.576 | 2.154 |
| 107 | C | 17.901 | 15.861 | 2.154 |
| 108 | C | 16.530 | 16.063 | 2.154 |
| 109 | C | 15.679 | 14.960 | 2.154 |
| 110 | C | 16.201 | 13.677 | 2.154 |
| 111 | N | 16.030 | 17.392 | 2.154 |
| 112 | S | 15.454 | 20.452 | 2.154 |
| 113 | C | 14.319 | 19.045 | 2.154 |
| 114 | C | 14.775 | 17.668 | 2.154 |
| 115 | C | 13.033 | 19.336 | 2.154 |
| 116 | C | 12.822 | 20.758 | 2.154 |
| 117 | C | 13.995 | 21.475 | 2.154 |
| 118 | N | 17.045 | 8.719  | 2.154 |
| 119 | S | 15.474 | 9.310  | 2.154 |
| 120 | N | 16.048 | 10.888 | 2.154 |
| 121 | H | 21.247 | 10.598 | 2.154 |
| 122 | H | 20.211 | 12.852 | 2.154 |
| 123 | H | 19.542 | 14.435 | 2.154 |
| 124 | H | 18.603 | 16.748 | 2.154 |
| 125 | H | 14.558 | 15.112 | 2.154 |
| 126 | H | 15.506 | 12.784 | 2.154 |

|     |   |        |        |       |
|-----|---|--------|--------|-------|
| 127 | H | 14.023 | 16.824 | 2.154 |
| 128 | H | 12.147 | 18.632 | 2.154 |
| 129 | C | 32.651 | 0.857  | 2.154 |
| 130 | C | 33.296 | -0.377 | 2.154 |
| 131 | C | 34.680 | -0.441 | 2.154 |
| 132 | C | 35.449 | 0.722  | 2.154 |
| 133 | C | 34.792 | 1.950  | 2.154 |
| 134 | C | 33.408 | 2.018  | 2.154 |
| 135 | N | 31.235 | 0.959  | 2.154 |
| 136 | C | 30.458 | -0.064 | 2.154 |
| 137 | C | 28.214 | -0.947 | 2.154 |
| 138 | C | 29.017 | 0.099  | 2.154 |
| 139 | S | 28.215 | 1.719  | 2.154 |
| 140 | C | 26.675 | 0.824  | 2.154 |
| 141 | C | 26.834 | -0.542 | 2.154 |
| 142 | H | 32.687 | -1.330 | 2.154 |
| 143 | H | 35.195 | -1.448 | 2.154 |
| 144 | H | 35.395 | 2.908  | 2.154 |
| 145 | H | 32.891 | 3.024  | 2.154 |
| 146 | H | 30.905 | -1.103 | 2.154 |
| 147 | H | 28.646 | -1.992 | 2.154 |

---

## NMR Spectra of Some Compounds

### $^1\text{H}$ of compound A ( $\text{CDCl}_3$ )

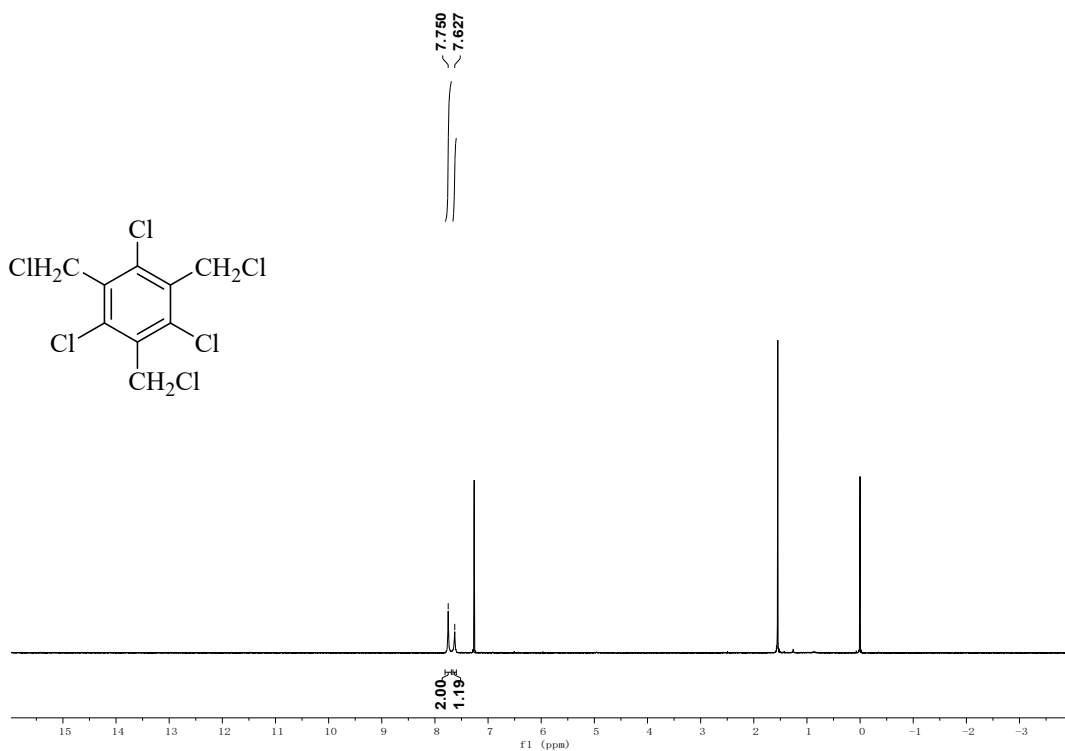

### $^1\text{H}$ of compound B ( $\text{CDCl}_3$ )

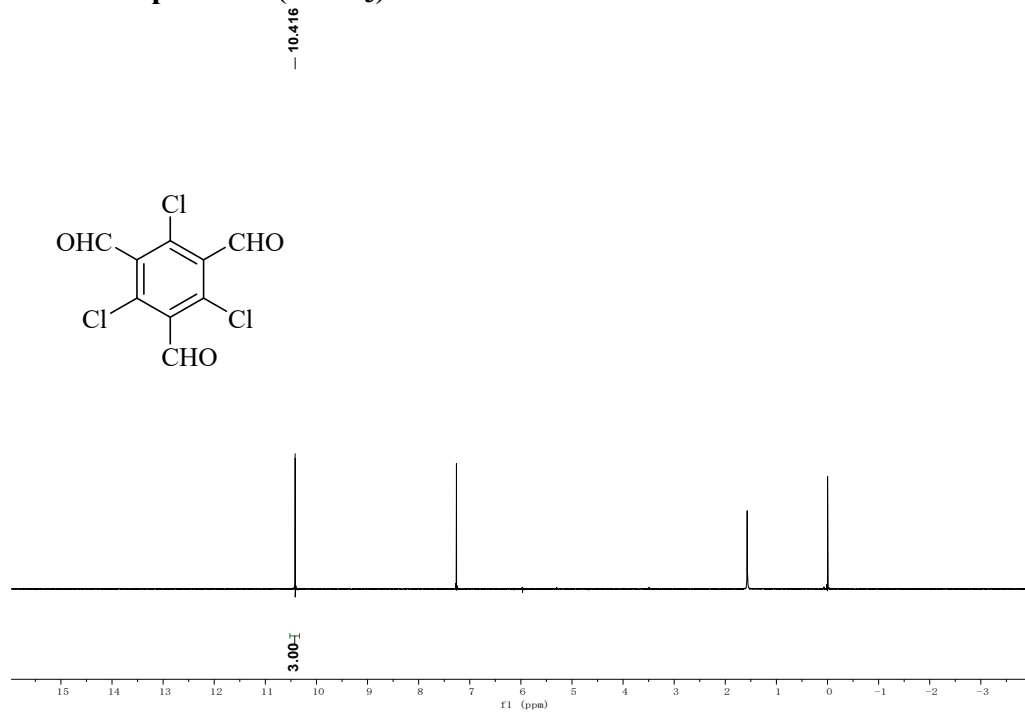

# 1H and 13C Spectra of compound BT (DMSO)

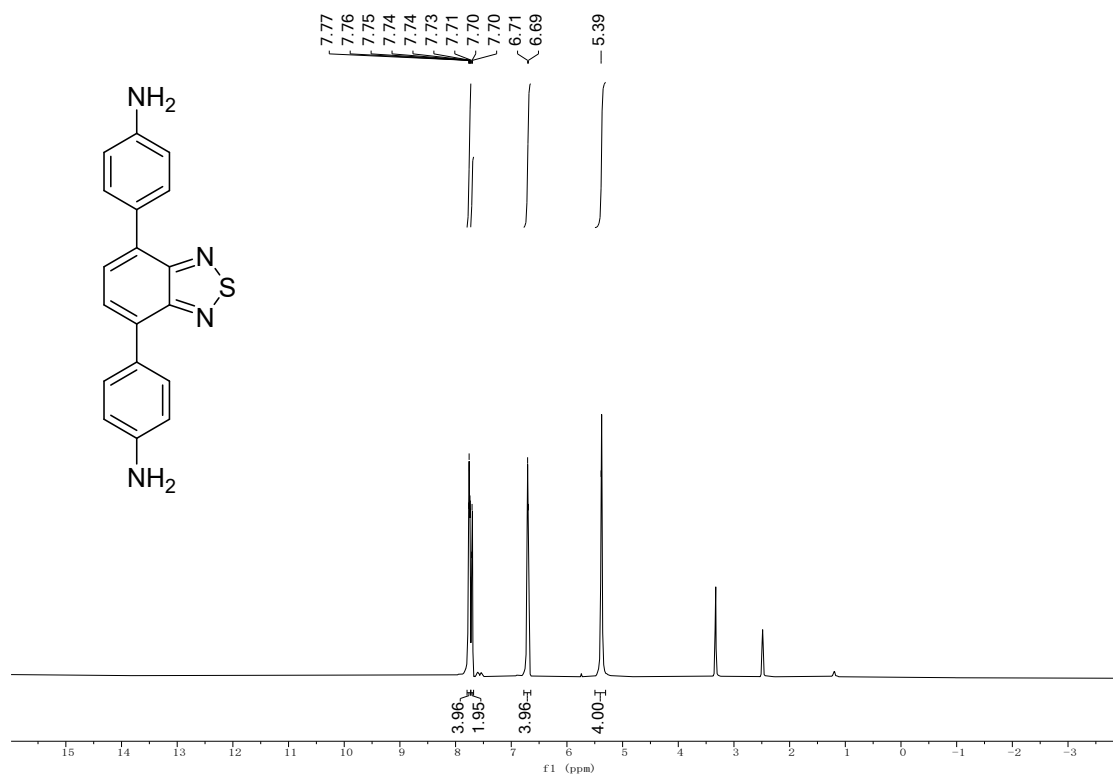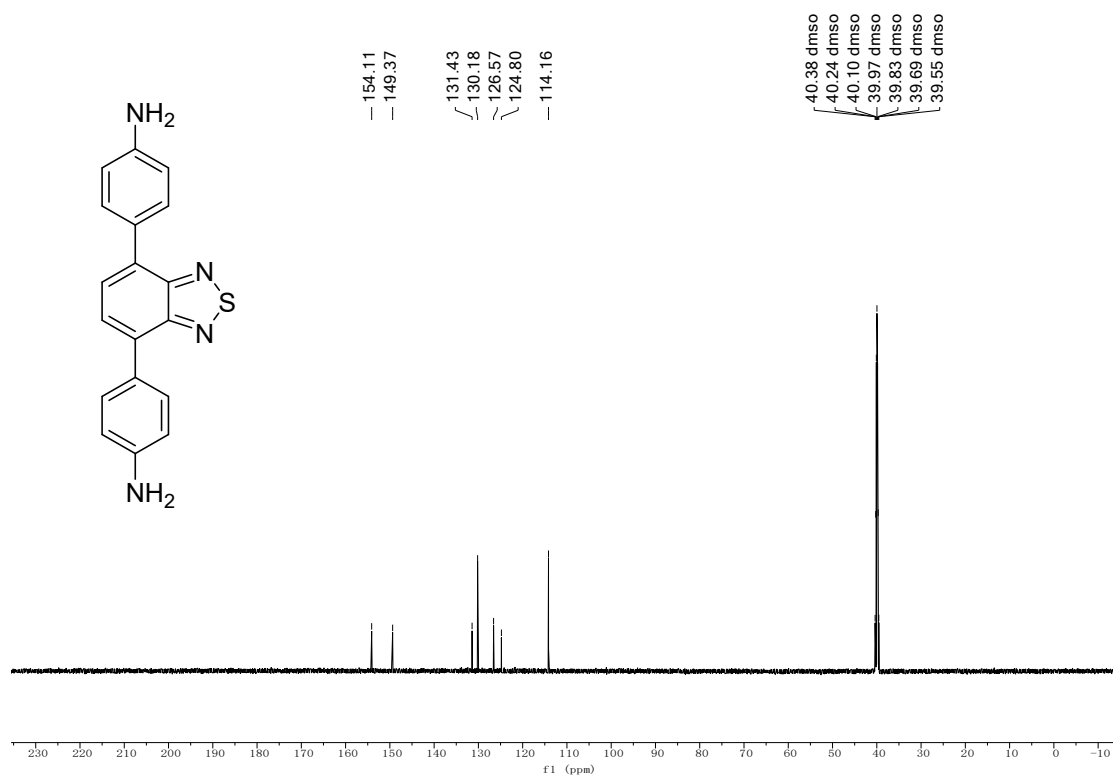

# 1H and 13C Spectra of compound 1 (CDCl<sub>3</sub>)

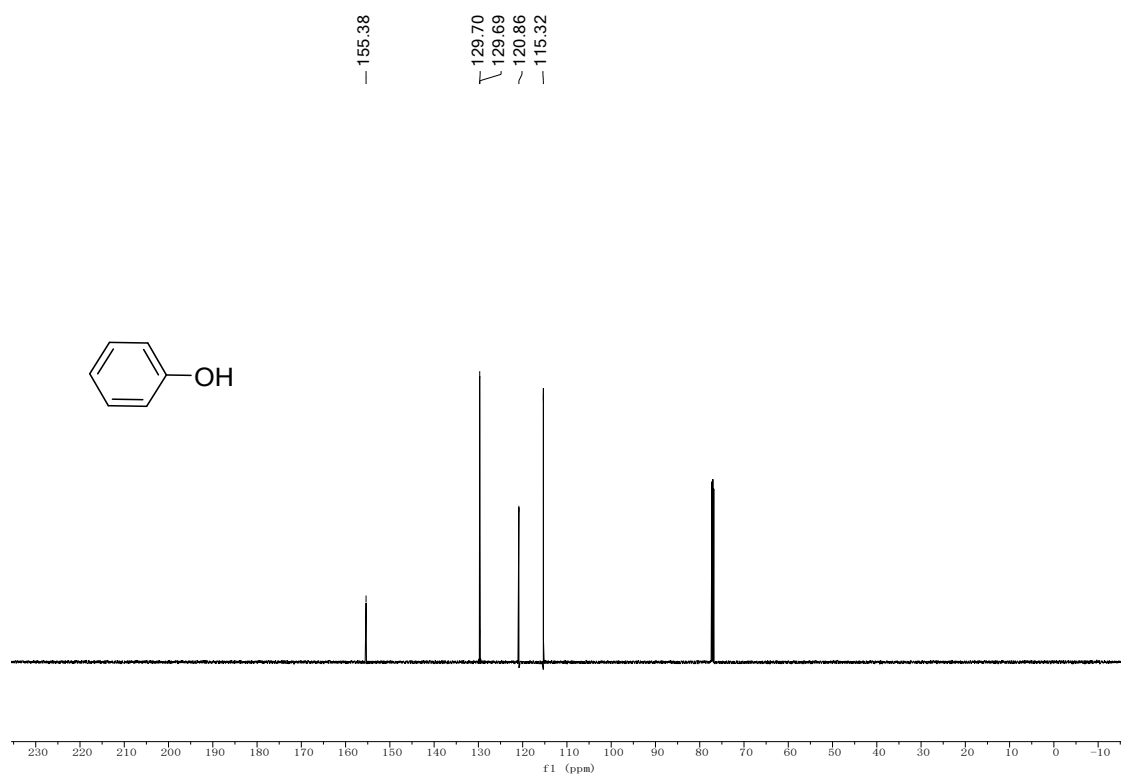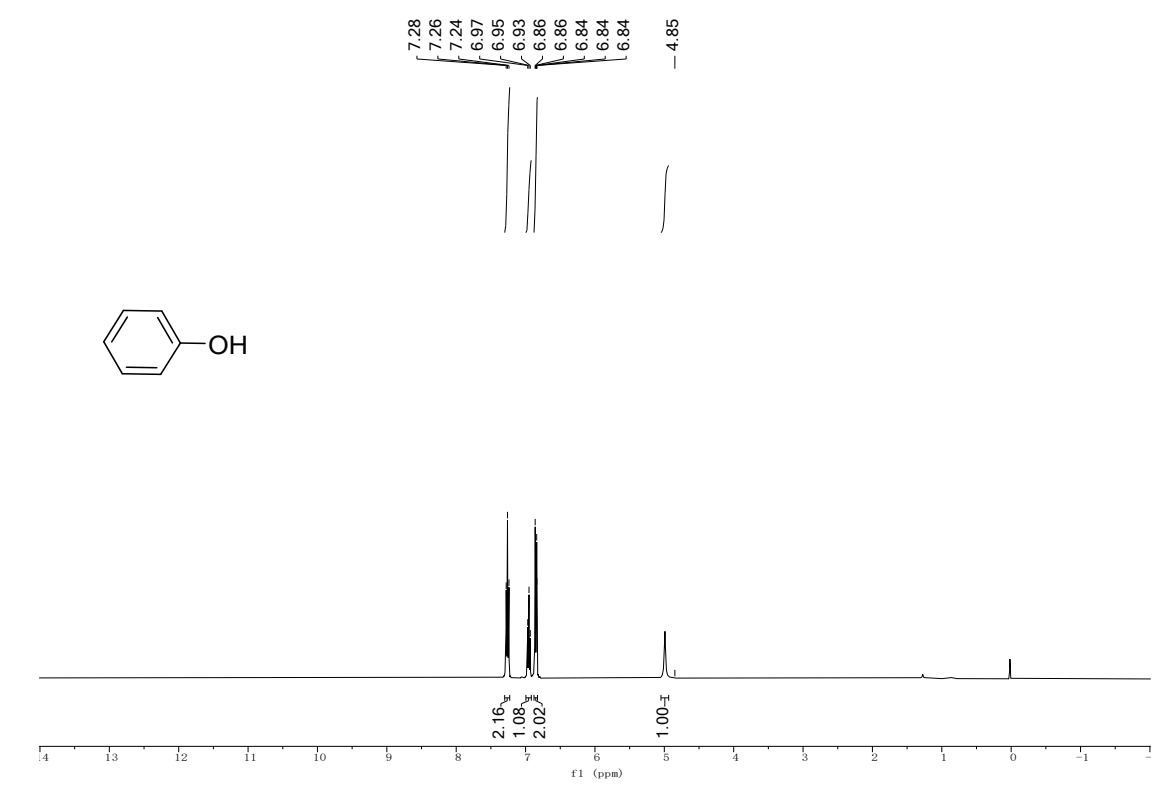

# 1H and 13C Spectra of compound 2 (CDCl<sub>3</sub>)

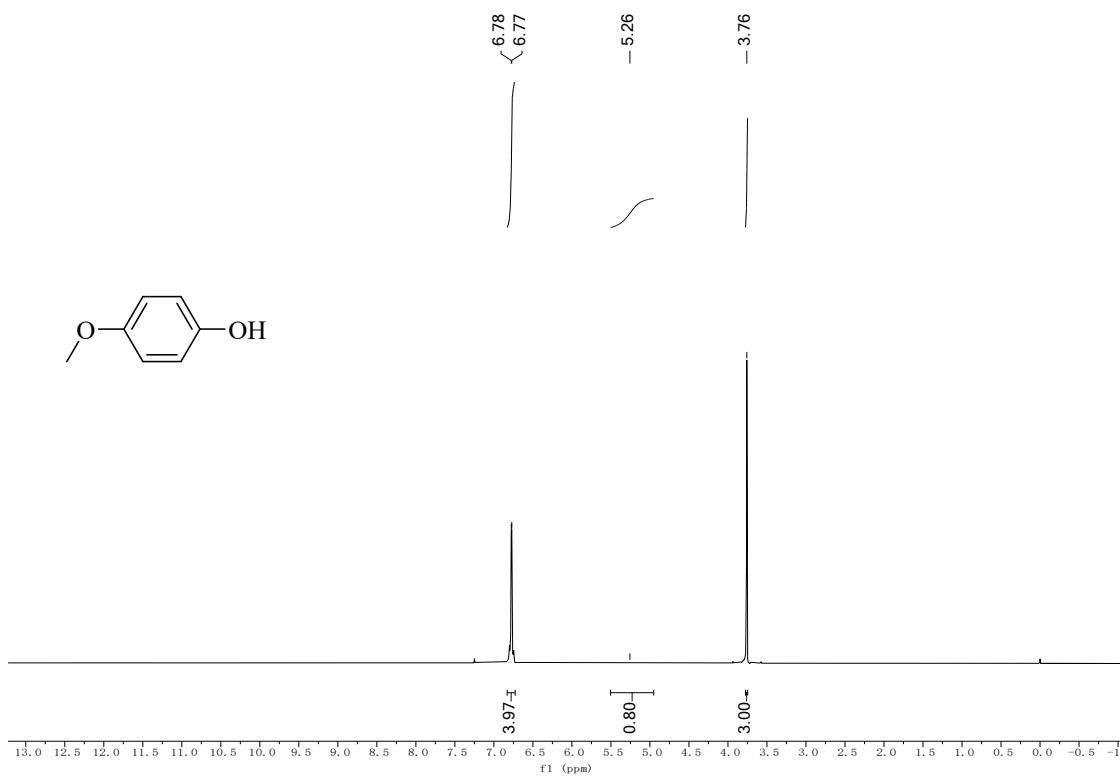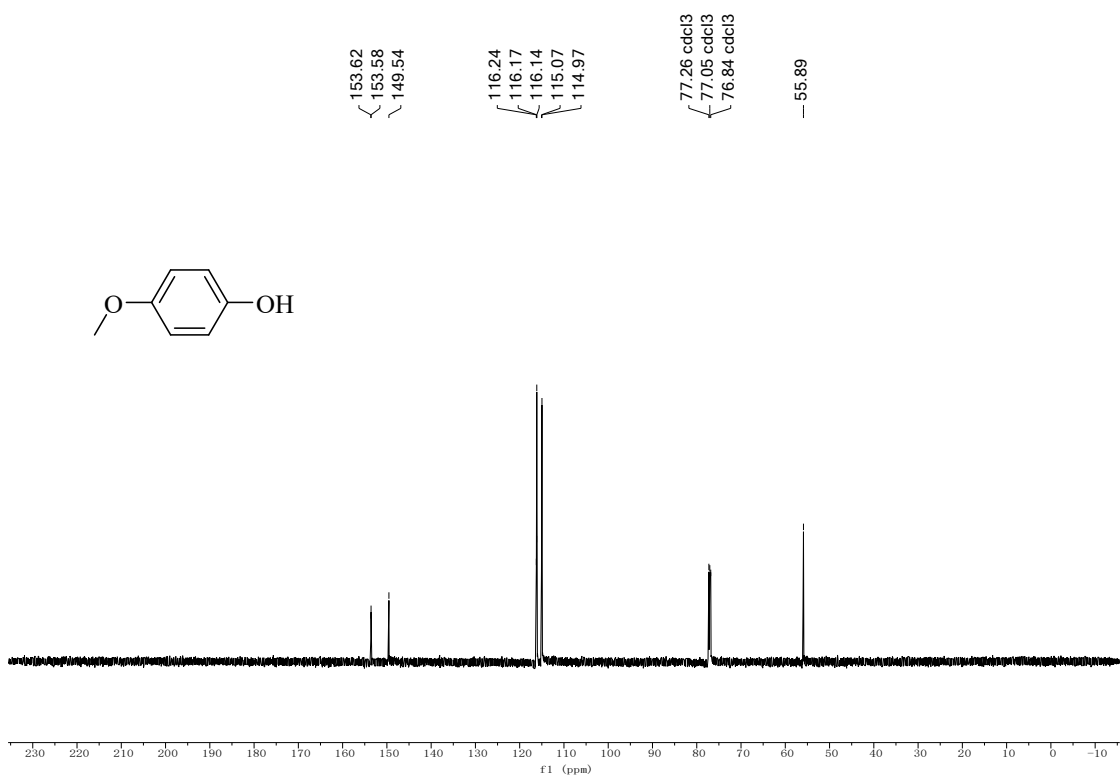



# 1H and 13C Spectra of compound 3 (DMSO)

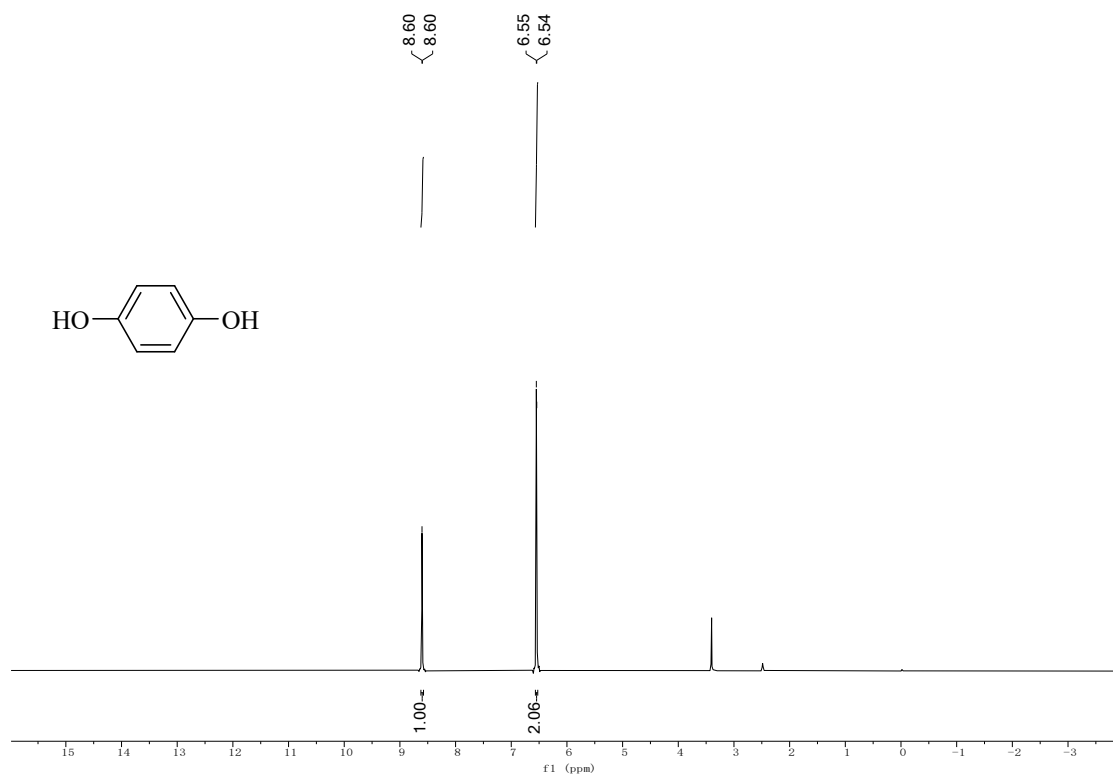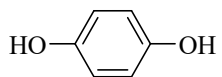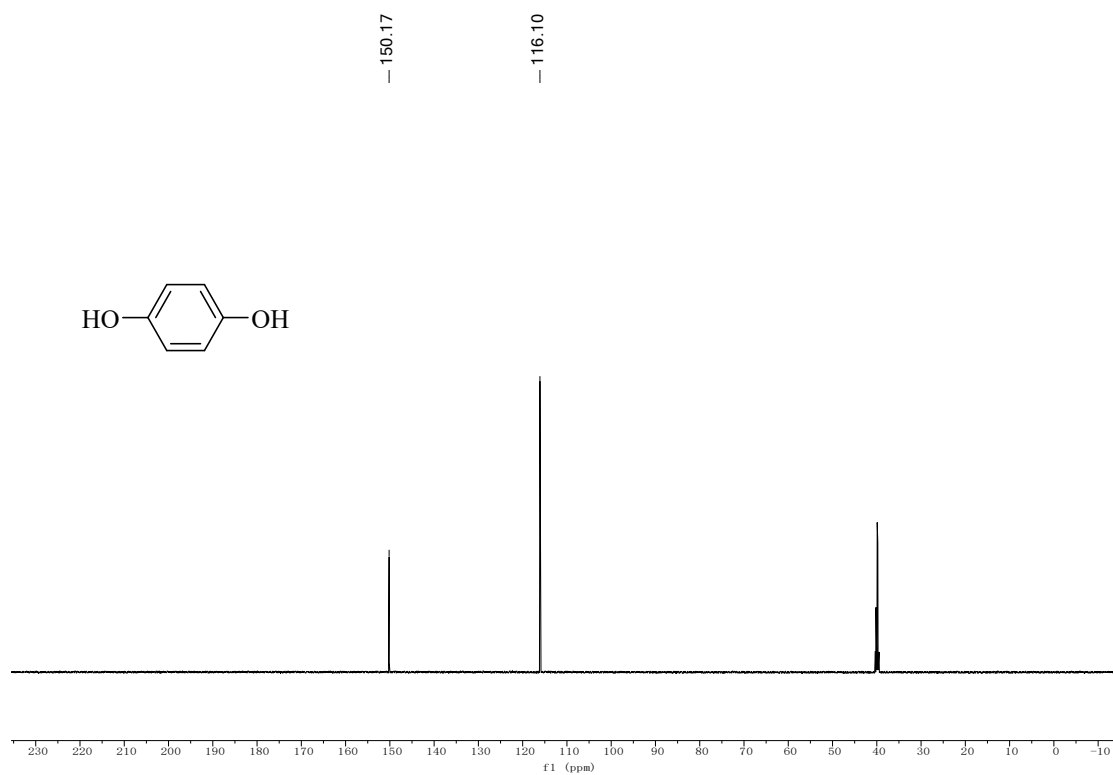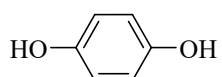

# <sup>1</sup>H and <sup>13</sup>C Spectra of compound 4 (CDCl<sub>3</sub>)

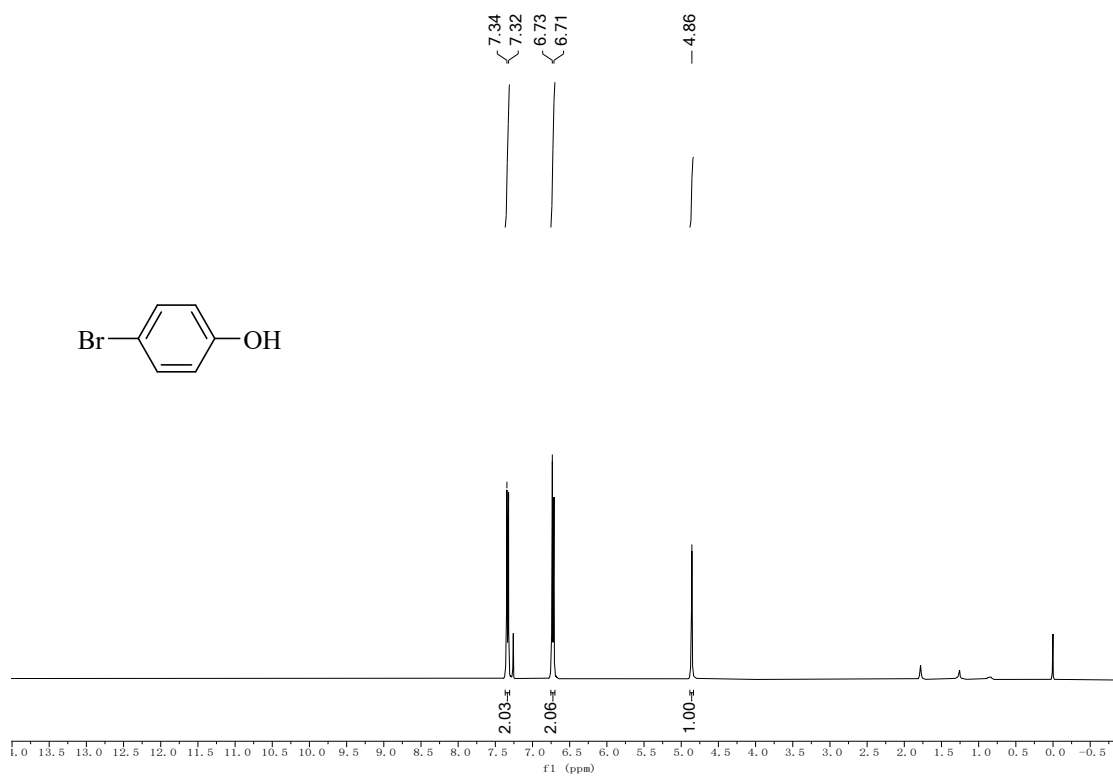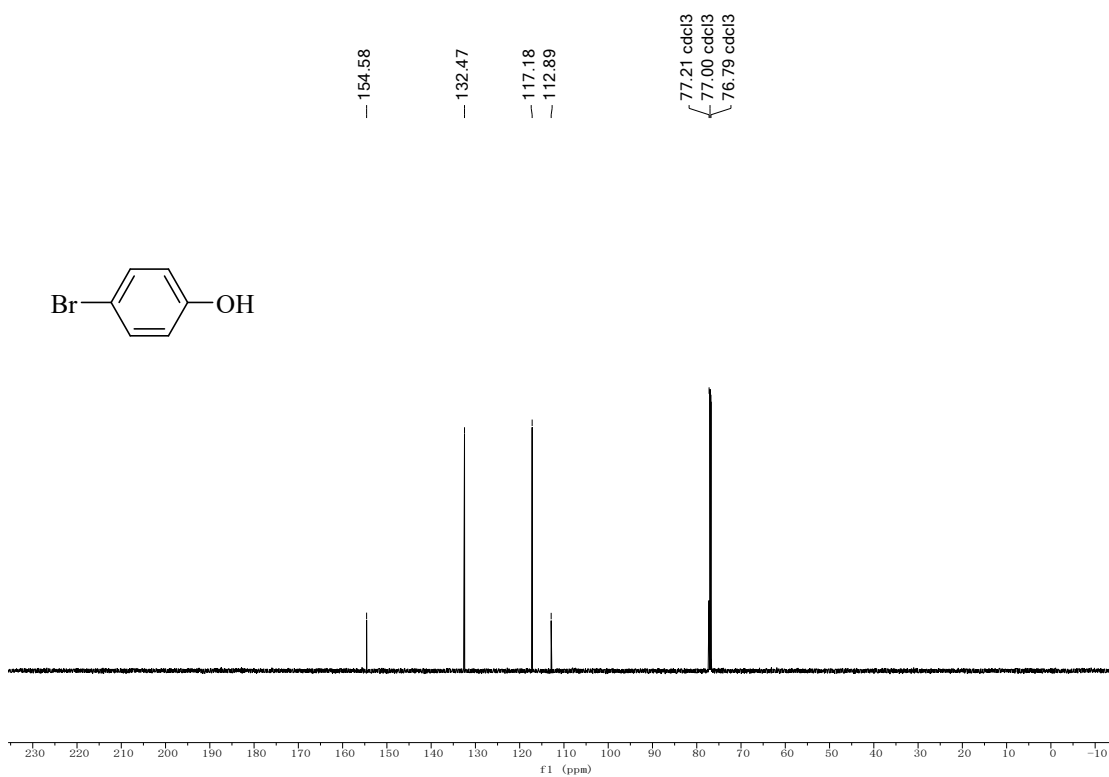

# 1H and 13C Spectra of compound 5 (DMSO)

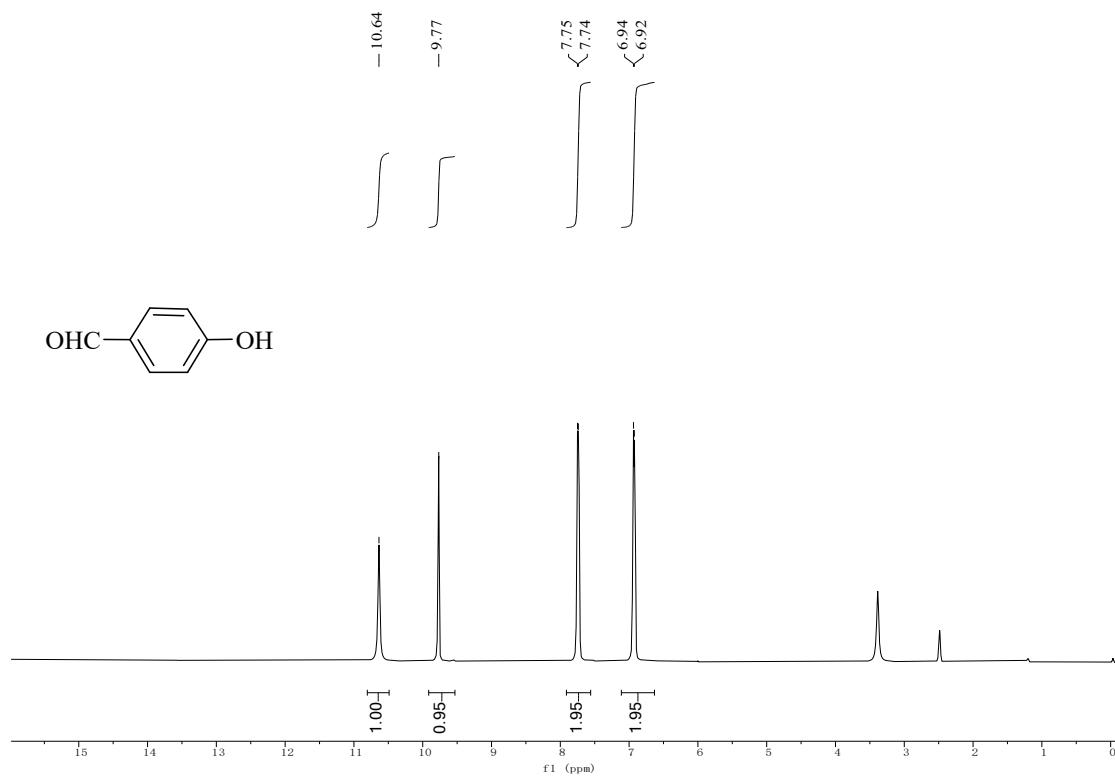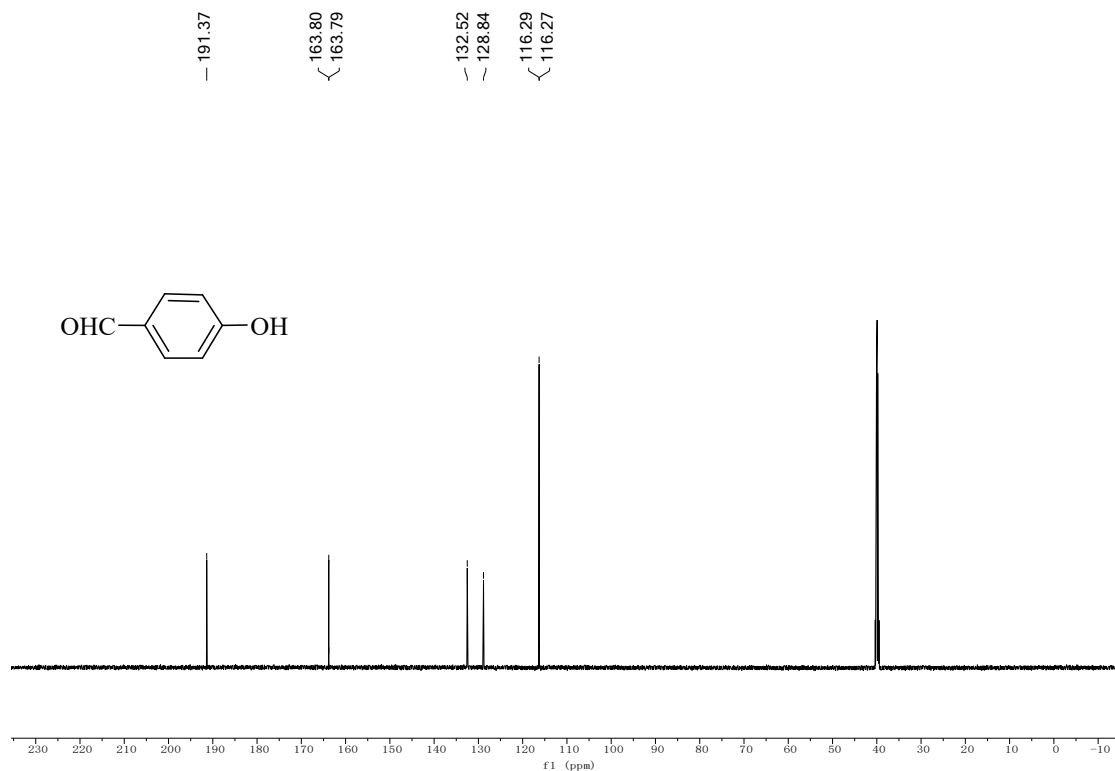

# 1H and 13C Spectra of compound 6 (CDCl<sub>3</sub>)

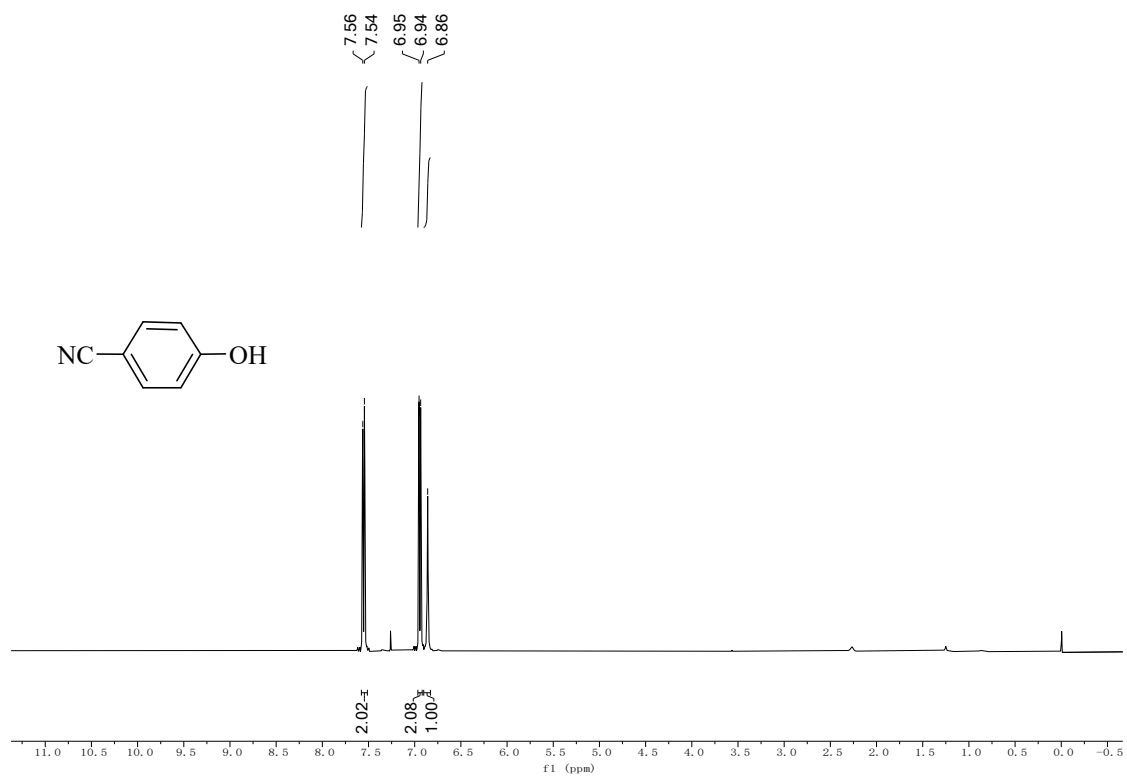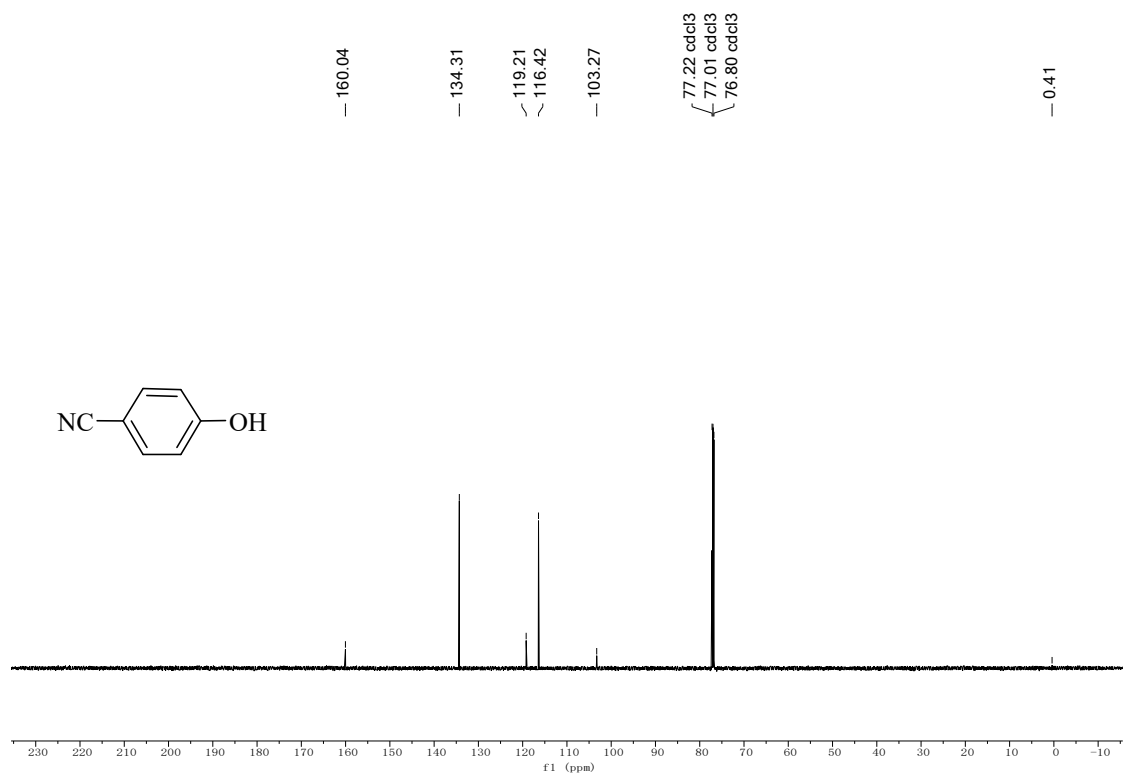

# **<sup>1</sup>H and <sup>13</sup>C Spectra of compound 7 (DMSO)**

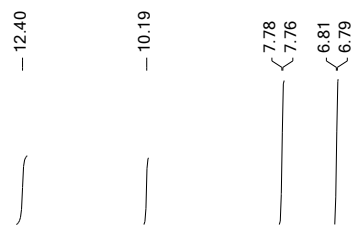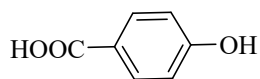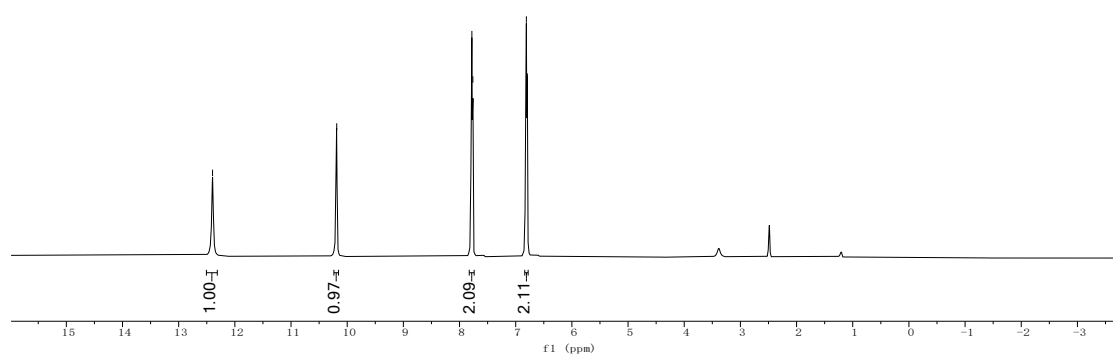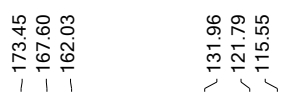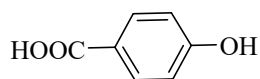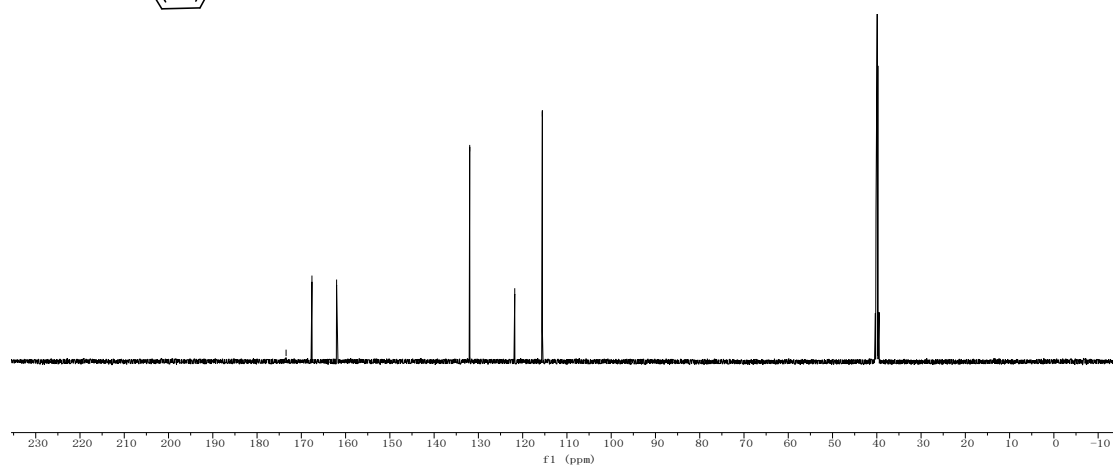

# 1H and 13C Spectra of compound 8 (DMSO)

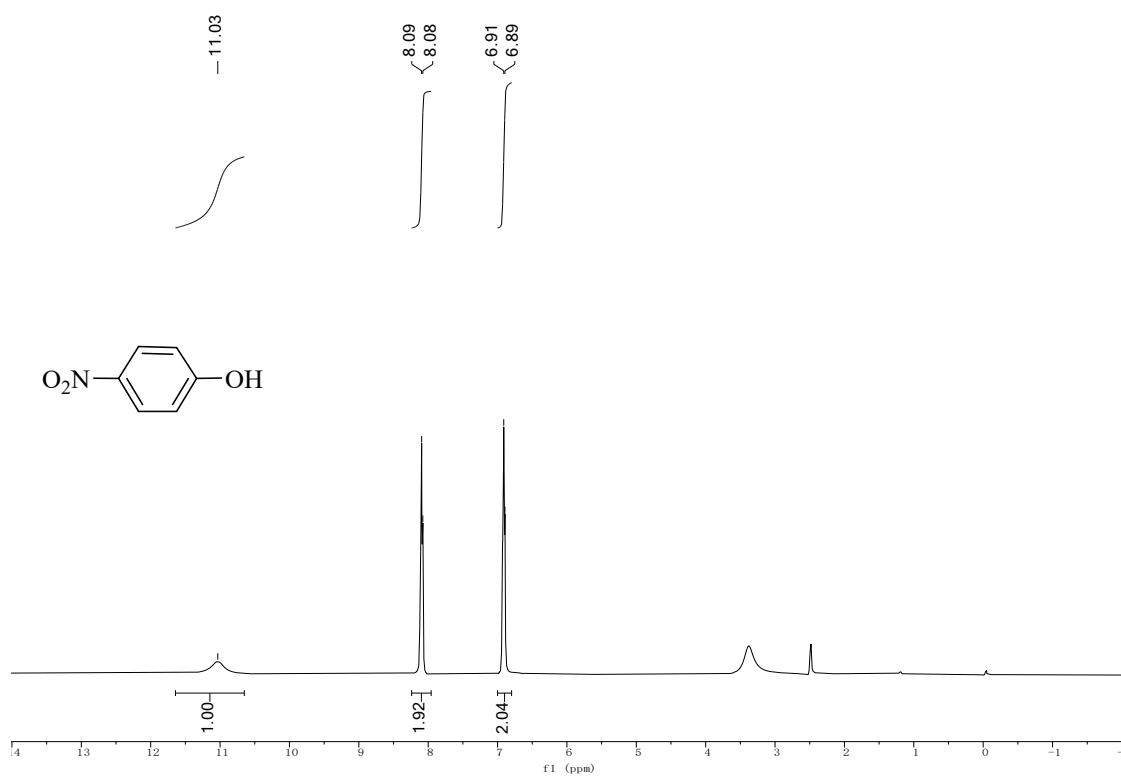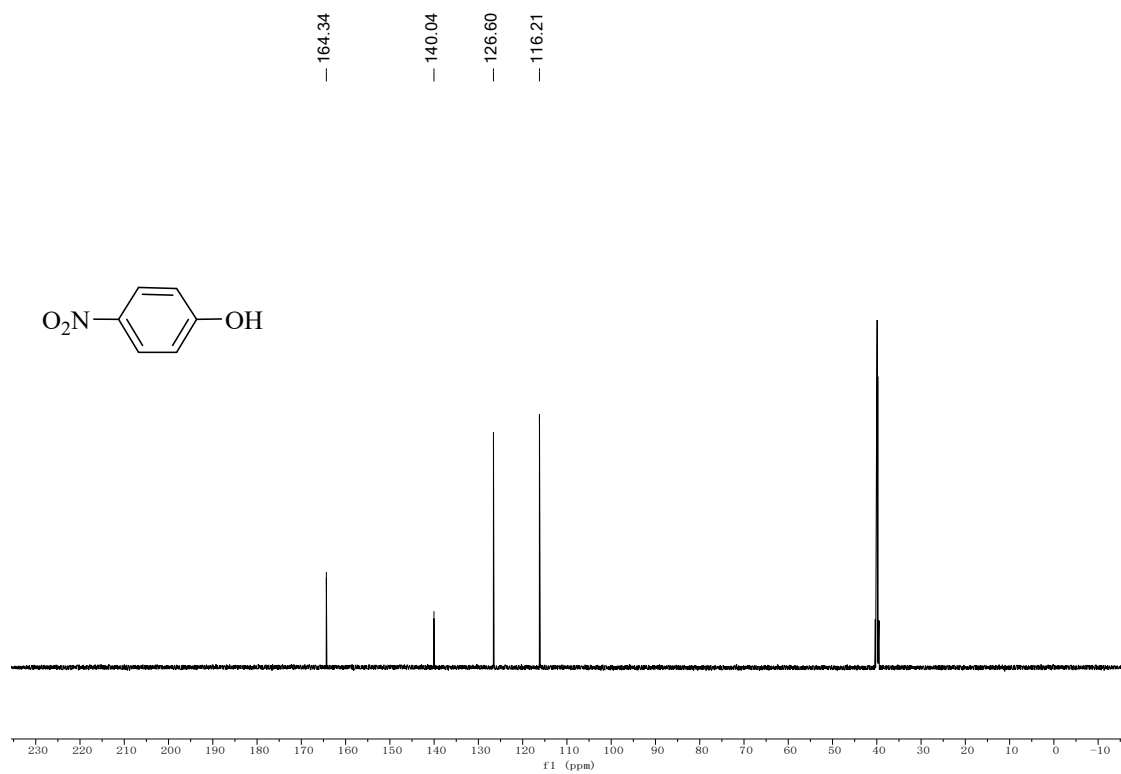

# 1H and 13C Spectra of compound 9 (CDCl<sub>3</sub>)

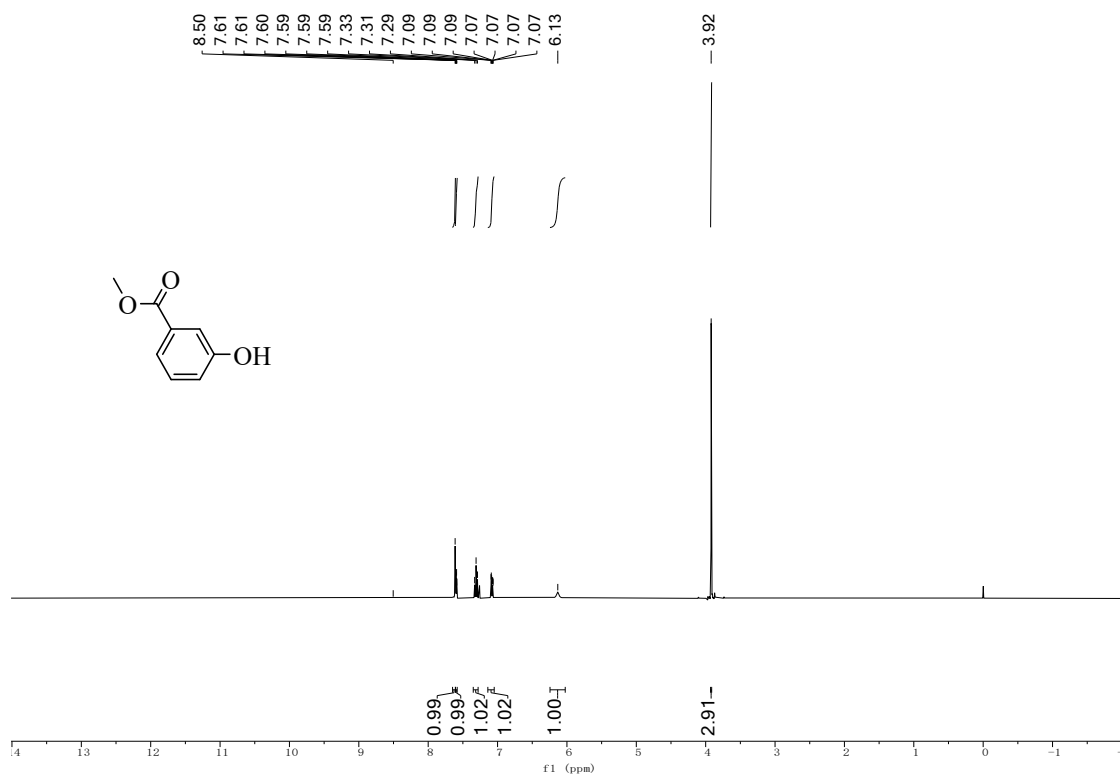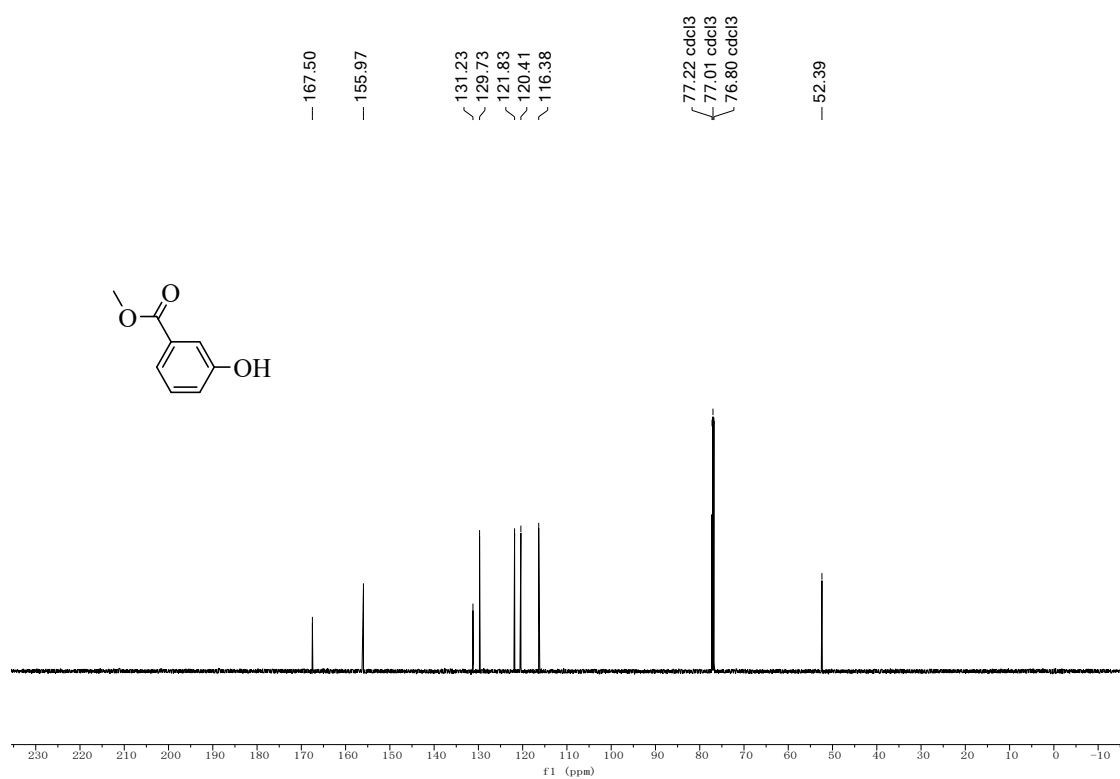

# 1H and 13C Spectra of compound 10 (CDCl<sub>3</sub>)

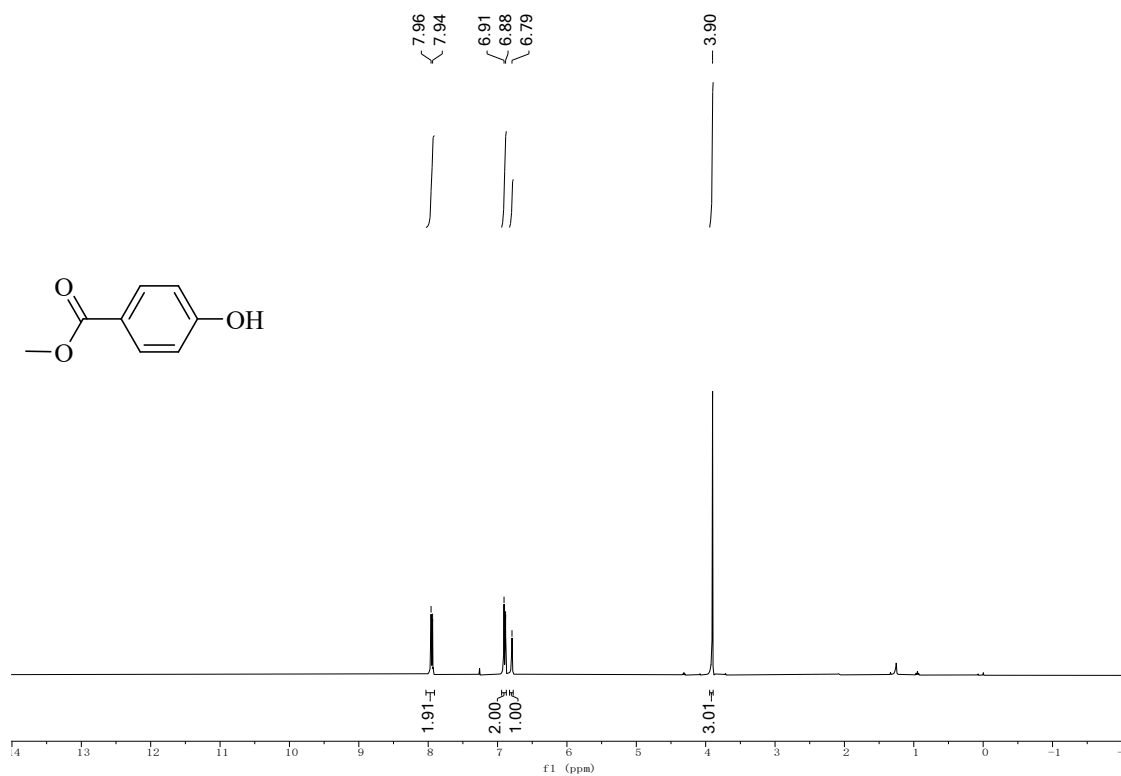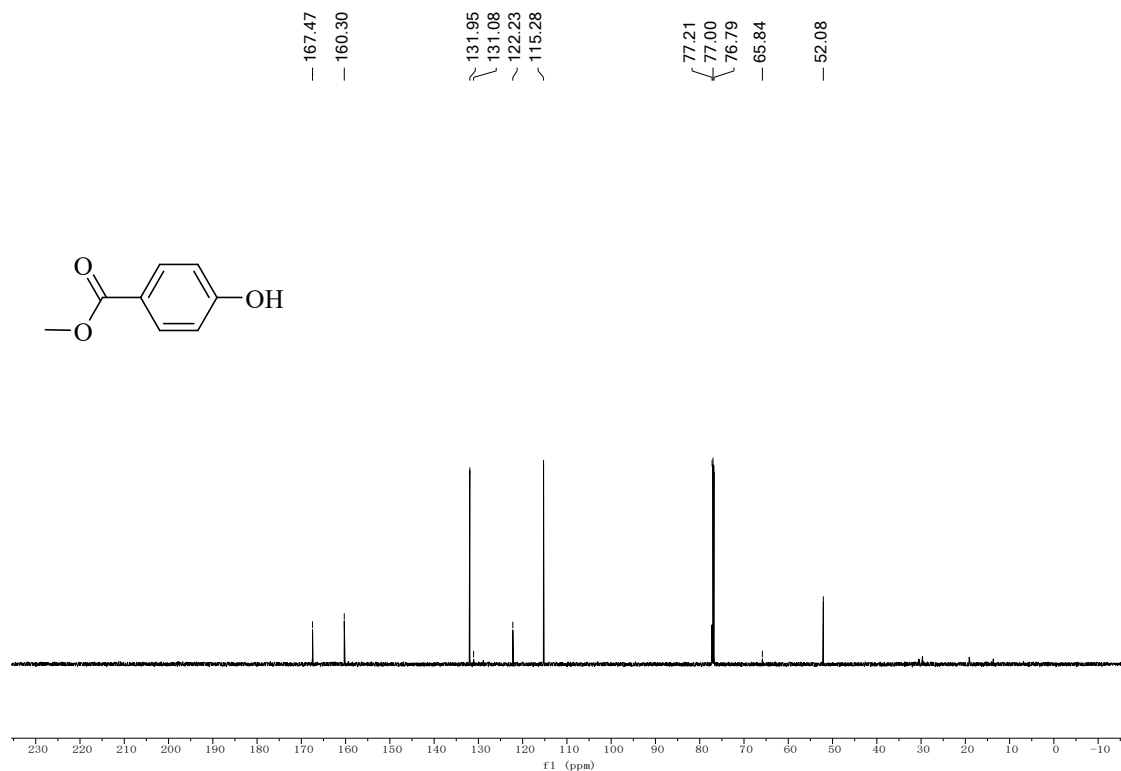



# 1H and 13C Spectra of compound 11 (CDCl<sub>3</sub>)

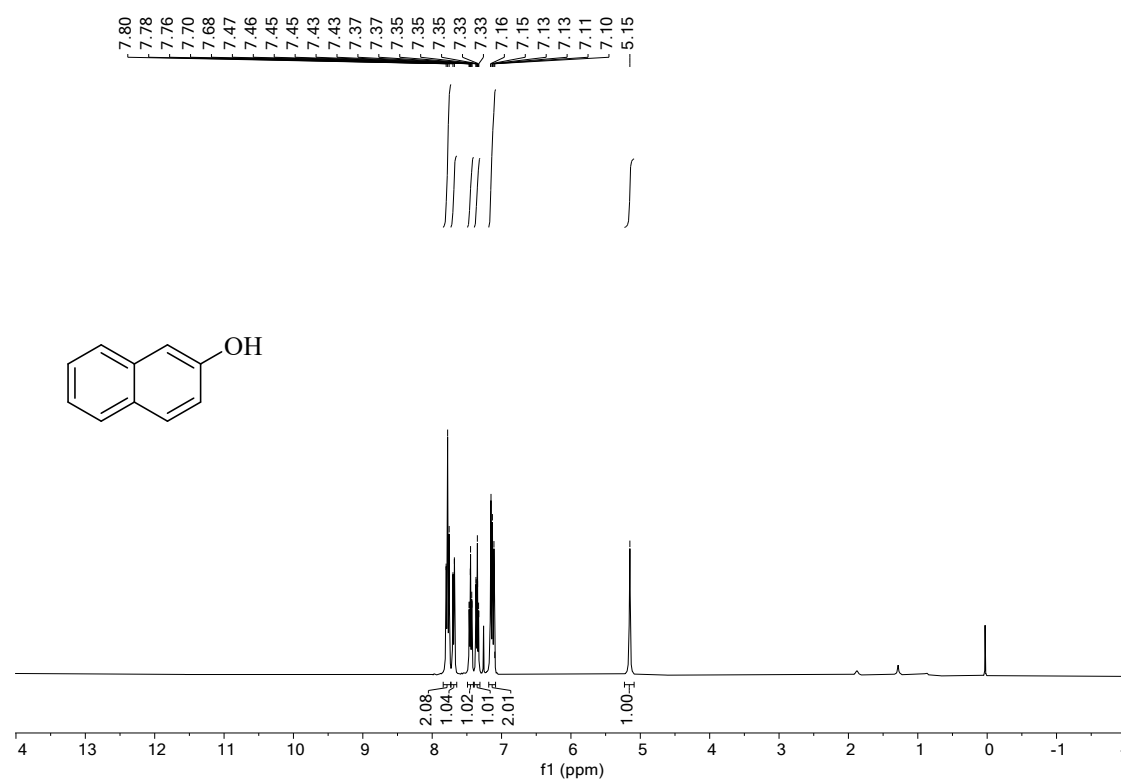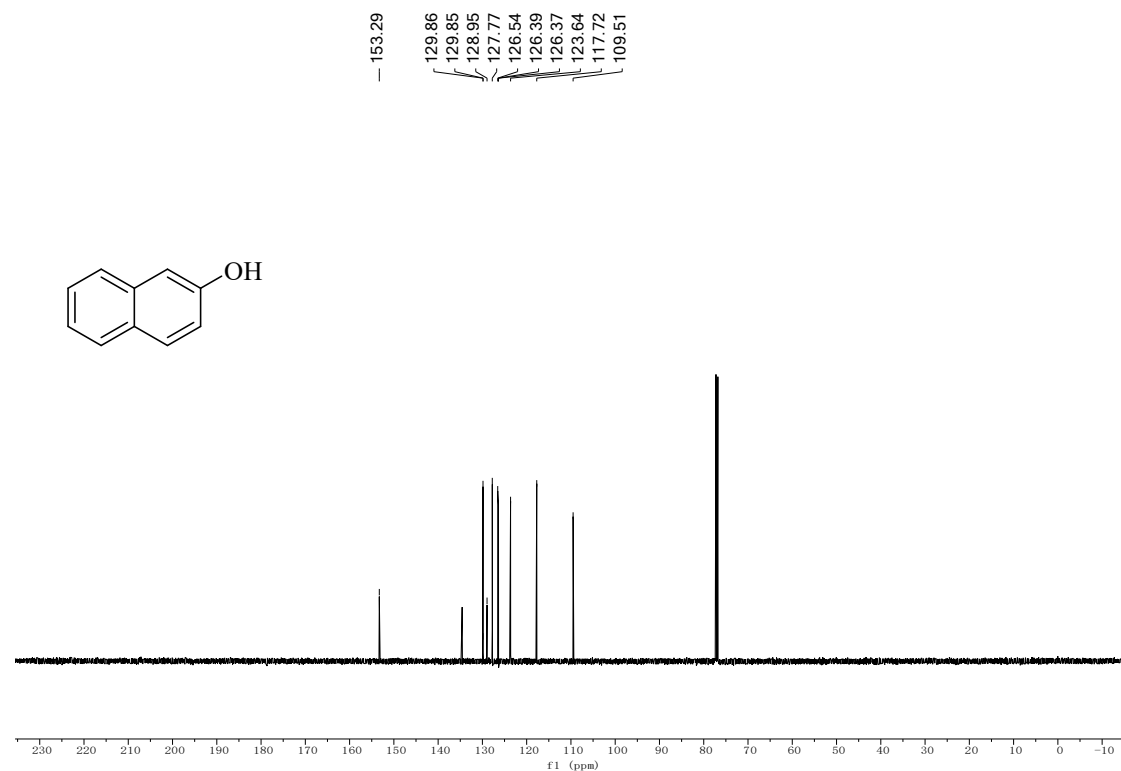

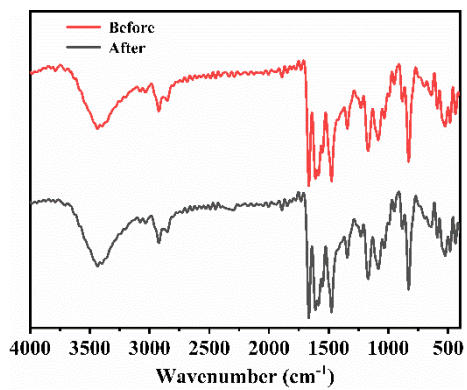

**Fig. S5** FT-IR diagram before and after the reaction.

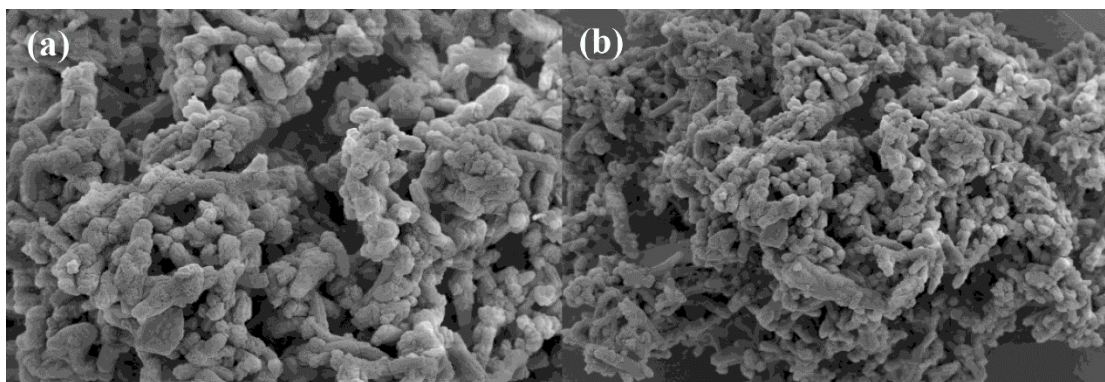

**Fig. S6** SEM before (a) and (b) SEM after the reaction.
